# Supplementary material for: Phenotypic Screen with the Human Secretome Identifies FGF16 as Inducing Proliferation of iPSC-Derived Cardiac Progenitor Cells
Source: Int J Mol Sci. 2019 Nov 30;20(23):6037. doi: 10.3390/ijms20236037 (PMC6928864; doi:10.3390/ijms20236037)
Supplement: Supplementary file 1 [file ijms-20-06037-s001.zip › Table S1.xlsx]

## Sheet: Sheet1
hCPC	updated uniprot_id wo isoform	gene_name	protein_type
CPC	A0PJZ3	GXYLT2	secreted
CPC	A4D1T9	PRSS37	secreted
CPC	A6NE02	BTBD17	secreted
CPC	A6NI73	LILRA5	ecd
CPC	B1AKI9	ISM1	secreted
CPC	B2RUY7	VWC2L	secreted
CPC	I3L3R5	CCER2	secreted
CPC	O00115	DNASE2	secreted
CPC	O00175	CCL24	secreted
CPC	O00182	LGALS9	secreted
CPC	O00300	TNFRSF11B	secreted
CPC	O00339	MATN2	secreted
CPC	O00451	GFRA2	secreted
CPC	O00462	MANBA	secreted
CPC	O00468	AGRN	secreted
CPC	O00584	RNASET2	secreted
CPC	O00587	MFNG	secreted
CPC	O00602	FCN1	secreted
CPC	O00754	MAN2B1	secreted
CPC	O14511	NRG2	ecd
CPC	O14672	ADAM10	secreted
CPC	O14773	TPP1	secreted
CPC	O14786	NRP1	secreted
CPC	O14792	HS3ST1	secreted
CPC	O14793	MSTN	secreted
CPC	O14944	EREG	secreted
CPC	O15204	ADAMDEC1	secreted
CPC	O15232	MATN3	secreted
CPC	O15335	CHAD	secreted
CPC	O15467	CCL16	secreted
CPC	O15496	PLA2G10	secreted
CPC	O15520	FGF10	secreted
CPC	O43240	KLK10	secreted
CPC	O43280	TREH	secreted
CPC	O43286	B4GALT5	secreted
CPC	O43320	FGF16	secreted
CPC	O43405	COCH	secreted
CPC	O43505	B4GAT1	secreted
CPC	O43557	TNFSF14	ecd
CPC	O43699	SIGLEC6	ecd
CPC	O43827	ANGPTL7	secreted
CPC	O43854	EDIL3	secreted
CPC	O43866	CD5L	secreted
CPC	O43915	FIGF	secreted
CPC	O60243	HS6ST1	secreted
CPC	O60258	FGF17	secreted
CPC	O60259	KLK8	secreted
CPC	O60383	GDF9	secreted
CPC	O60462	NRP2	secreted
CPC	O60507	TPST1	secreted
CPC	O60513	B4GALT4	secreted
CPC	O60542	PSPN	secreted
CPC	O60568	PLOD3	secreted
CPC	O60575	SPINK4	secreted
CPC	O60704	TPST2	secreted
CPC	O60895	RAMP2	ecd
CPC	O75015	FCGR3B	secreted
CPC	O75022	LILRB3	ecd
CPC	O75356	ENTPD5	secreted
CPC	O75462	CRLF1	secreted
CPC	O75493	CA11	secreted
CPC	O75594	PGLYRP1	secreted
CPC	O75610	LEFTY1	secreted
CPC	O75629	CREG1	secreted
CPC	O75636	FCN3	secreted
CPC	O75711	SCRG1	secreted
CPC	O75715	GPX5	secreted
CPC	O75830	SERPINI2	secreted
CPC	O75973	C1QL1	secreted
CPC	O76061	STC2	secreted
CPC	O76093	FGF18	secreted
CPC	O76096	CST7	secreted
CPC	O94766	B3GAT3	secreted
CPC	O94772	LY6H	secreted
CPC	O94779	CNTN5	secreted
CPC	O95150	TNFSF15	ecd
CPC	O95302	FKBP9	secreted
CPC	O95390	GDF11	secreted
CPC	O95407	TNFRSF6B	secreted
CPC	O95445	APOM	secreted
CPC	O95467	GNAS	secreted
CPC	O95479	H6PD	secreted
CPC	O95497	VNN1	secreted
CPC	O95633	FSTL3	secreted
CPC	O95711	LY86	secreted
CPC	O95750	FGF19	secreted
CPC	O95881	TXNDC12	secreted
CPC	O95897	OLFM2	secreted
CPC	O95965	ITGBL1	secreted
CPC	O95967	EFEMP2	secreted
CPC	O95971	CD160	secreted
CPC	O95994	AGR2	secreted
CPC	P00450	CP	secreted
CPC	P00734	F2	secreted
CPC	P00738	HP	secreted
CPC	P00739	HPR	secreted
CPC	P00746	CFD	secreted
CPC	P00747	PLG	secreted
CPC	P00751	CFB	secreted
CPC	P00797	REN	secreted
CPC	P00995	SPINK1	secreted
CPC	P01008	SERPINC1	secreted
CPC	P01009	SERPINA1	secreted
	P01011	SERPINA3	secreted
CPC	P01019	AGT	secreted
CPC	P01023	A2M	secreted
CPC	P01033	TIMP1	secreted
CPC	P01034	CST3	secreted
CPC	P01036	CST4	secreted
CPC	P01037	CST1	secreted
CPC	P01042	KNG1	secreted
CPC	P01137	TGFB1	secreted
CPC	P01138	NGF	secreted
CPC	P01160	NPPA	secreted
CPC	P01178	OXT	secreted
CPC	P01185	AVP	secreted
CPC	P01222	TSHB	secreted
CPC	P01225	FSHB	secreted
CPC	P01229	LHB	secreted
CPC	P01236	PRL	secreted
CPC	P01242	GH2	secreted
CPC	P01258	CALCA	secreted
CPC	P01270	PTH	secreted
CPC	P01282	VIP	secreted
CPC	P01303	NPY	secreted
CPC	P01308	INS	secreted
CPC	P01344	IGF2	secreted
CPC	P01350	GAST	secreted
CPC	P01374	LTA	secreted
CPC	P01563	IFNA2	secreted
CPC	P01566	IFNA10	secreted
CPC	P01567	IFNA7	secreted
CPC	P01568	IFNA21	secreted
CPC	P01569	IFNA5	secreted
CPC	P01570	IFNA14	secreted
CPC	P01571	IFNA17	secreted
CPC	P01579	IFNG	secreted
CPC	P01584	IL1B	secreted
CPC	P01588	EPO	secreted
CPC	P01591	JCHAIN	secreted
CPC	P01730	CD4	ecd
CPC	P01732	CD8A	ecd
CPC	P02452	COL1A1	secreted
CPC	P02458	COL2A1	secreted
CPC	P02461	COL3A1	secreted
CPC	P02647	APOA1	secreted
CPC	P02679	FGG	secreted
CPC	P02741	CRP	secreted
CPC	P02743	APCS	secreted
CPC	P02746	C1QB	secreted
CPC	P02747	C1QC	secreted
CPC	P02748	C9	secreted
CPC	P02749	APOH	secreted
CPC	P02750	LRG1	secreted
CPC	P02753	RBP4	secreted
CPC	P02760	AMBP	secreted
CPC	P02763	ORM1	secreted
CPC	P02765	AHSG	secreted
CPC	P02766	TTR	secreted
CPC	P02768	ALB	secreted
CPC	P02771	AFP	secreted
CPC	P02774	GC	secreted
CPC	P02775	PPBP	secreted
CPC	P02776	PF4	secreted
CPC	P02786	TFRC	ecd
CPC	P02788	LTF	secreted
CPC	P02790	HPX	secreted
CPC	P03950	ANG	secreted
CPC	P03951	F11	secreted
CPC	P03956	MMP1	secreted
CPC	P04004	VTN	secreted
CPC	P04054	PLA2G1B	secreted
CPC	P04066	FUCA1	secreted
CPC	P04070	PROC	secreted
CPC	P04085	PDGFA	secreted
CPC	P04118	CLPS	secreted
CPC	P04141	CSF2	secreted
CPC	P04155	TFF1	secreted
CPC	P04180	LCAT	secreted
CPC	P04196	HRG	secreted
CPC	P04216	THY1	secreted
CPC	P04217	A1BG	secreted
CPC	P04234	CD3D	ecd
CPC	P04278	SHBG	secreted
CPC	P04745	AMY1A	secreted
CPC	P04746	AMY2A	secreted
CPC	P05000	IFNW1	secreted
CPC	P05013	IFNA6	secreted
CPC	P05014	IFNA4	secreted
CPC	P05015	IFNA16	secreted
CPC	P05019	IGF1	secreted
CPC	P05090	APOD	secreted
CPC	P05106	ITGB3	ecd
CPC	P05107	ITGB2	ecd
CPC	P05112	IL4	secreted
CPC	P05113	IL5	secreted
CPC	P05120	SERPINB2	secreted
CPC	P05121	SERPINE1	secreted
CPC	P05154	SERPINA5	secreted
CPC	P05155	SERPING1	secreted
CPC	P05156	CFI	secreted
CPC	P05160	F13B	secreted
CPC	P05161	ISG15	secreted
CPC	P05164	MPO	secreted
CPC	P05230	FGF1	secreted
CPC	P05231	IL6	secreted
CPC	P05362	ICAM1	ecd
CPC	P05451	REG1A	secreted
CPC	P05452	CLEC3B	secreted
CPC	P05543	SERPINA7	secreted
CPC	P05546	SERPIND1	secreted
CPC	P05556	ITGB1	ecd
CPC	P05976	MYL1	secreted
CPC	P06127	CD5	ecd
CPC	P06280	GLA	secreted
CPC	P06396	GSN	secreted
CPC	P06681	C2	secreted
CPC	P06702	S100A9	secreted
CPC	P06727	APOA4	secreted
CPC	P06729	CD2	ecd
CPC	P06734	FCER2	ecd
CPC	P06744	GPI	secreted
CPC	P06865	HEXA	secreted
CPC	P06870	KLK1	secreted
CPC	P07093	SERPINE2	secreted
CPC	P07225	PROS1	secreted
CPC	P07237	P4HB	secreted
CPC	P07288	KLK3	secreted
CPC	P07333	CSF1R	ecd
CPC	P07339	CTSD	secreted
CPC	P07355	ANXA2	secreted
CPC	P07357	C8A	secreted
CPC	P07358	C8B	secreted
CPC	P07360	C8G	secreted
CPC	P07585	DCN	secreted
CPC	P07711	CTSL	secreted
CPC	P07858	CTSB	secreted
CPC	P07949	RET	ecd
CPC	P07998	RNASE1	secreted
CPC	P08174	CD55	secreted
CPC	P08185	SERPINA6	secreted
CPC	P08236	GUSB	secreted
CPC	P08253	MMP2	secreted
CPC	P08254	MMP3	secreted
CPC	P08294	SOD3	secreted
CPC	P08476	INHBA	secreted
CPC	P08571	CD14	secreted
CPC	P08620	FGF4	secreted
CPC	P08637	FCGR3A	ecd
CPC	P08697	SERPINF2	secreted
CPC	P08700	IL3	secreted
CPC	P08709	F7	secreted
CPC	P08833	IGFBP1	secreted
CPC	P08887	IL6R	secreted
CPC	P09228	CST2	secreted
CPC	P09237	MMP7	secreted
CPC	P09238	MMP10	secreted
CPC	P09326	CD48	secreted
CPC	P09341	CXCL1	secreted
CPC	P09382	LGALS1	secreted
CPC	P09466	PAEP	secreted
CPC	P09486	SPARC	secreted
CPC	P09529	INHBB	secreted
CPC	P09603	CSF1	ecd
CPC	P09619	PDGFRB	ecd
CPC	P09668	CTSH	secreted
CPC	P09919	CSF3	secreted
CPC	P09958	FURIN	secreted
CPC	P0C862	C1QTNF9	secreted
CPC	P0C8F1	PATE4	secreted
CPC	P0DML2	CSH1	secreted
CPC	P0DN86	CGB	secreted
CPC	P10124	SRGN	secreted
CPC	P10144	GZMB	secreted
CPC	P10145	CXCL8	secreted
CPC	P10147	CCL3	secreted
CPC	P10153	RNASE2	secreted
CPC	P10586	PTPRF	ecd
CPC	P10599	TXN	secreted
CPC	P10643	C7	secreted
CPC	P10645	CHGA	secreted
CPC	P10720	PF4V1	secreted
CPC	P10767	FGF6	secreted
CPC	P10909	CLU	secreted
CPC	P10912	GHR	ecd
CPC	P10915	HAPLN1	secreted
CPC	P10966	CD8B	secreted
CPC	P10966	CD8B	secreted
CPC	P10997	IAPP	secreted
CPC	P11021	HSPA5	secreted
CPC	P11226	MBL2	secreted
CPC	P11464	PSG1	secreted
CPC	P11465	PSG2	secreted
CPC	P11684	SCGB1A1	secreted
CPC	P12034	FGF5	secreted
CPC	P12110	COL6A2	secreted
CPC	P12273	PIP	secreted
CPC	P12532	CKMT1A	secreted
CPC	P12544	GZMA	secreted
CPC	P12724	RNASE3	secreted
CPC	P12821	ACE	ecd
CPC	P12830	CDH1	ecd
CPC	P13232	IL7	ecd
CPC	P13232	IL7	secreted
CPC	P13236	CCL4	secreted
CPC	P13284	IFI30	secreted
CPC	P13500	CCL2	secreted
CPC	P13521	SCG2	secreted
CPC	P13591	NCAM1	ecd
CPC	P13598	ICAM2	ecd
CPC	P13667	PDIA4	secreted
CPC	P13671	C6	secreted
CPC	P13686	ACP5	secreted
CPC	P13688	CEACAM1	ecd
CPC	P13726	F3	ecd
CPC	P13995	MTHFD2	secreted
CPC	P14174	MIF	secreted
CPC	P14543	NID1	secreted
CPC	P14625	HSP90B1	secreted
CPC	P14778	IL1R1	ecd
CPC	P14780	MMP9	secreted
CPC	P14784	IL2RB	ecd
CPC	P15018	LIF	secreted
CPC	P15085	CPA1	secreted
CPC	P15248	IL9	secreted
CPC	P15309	ACPP	secreted
CPC	P15502	ELN	secreted
CPC	P15692	VEGFA	secreted
CPC	P15848	ARSB	secreted
CPC	P16035	TIMP2	secreted
CPC	P16070	CD44	ecd
CPC	P16233	PNLIP	secreted
CPC	P16234	PDGFRA	ecd
CPC	P16410	CTLA4	ecd
CPC	P16422	EPCAM	ecd
CPC	P16471	PRLR	ecd
CPC	P16562	CRISP2	secreted
CPC	P16870	CPE	secreted
CPC	P16871	IL7R	ecd
CPC	P17050	NAGA	secreted
CPC	P17181	IFNAR1	ecd
CPC	P17213	BPI	secreted
CPC	P17900	GM2A	secreted
CPC	P17936	IGFBP3	secreted
CPC	P17948	FLT1	secreted
CPC	P18065	IGFBP2	secreted
CPC	P18428	LBP	secreted
CPC	P18510	IL1RN	secreted
CPC	P19438	TNFRSF1A	ecd
CPC	P19652	ORM2	secreted
CPC	P19801	AOC1	secreted
CPC	P19875	CXCL2	secreted
CPC	P19876	CXCL3	secreted
CPC	P19883	FST	secreted
CPC	P19961	AMY2B	secreted
CPC	P20061	TCN1	secreted
CPC	P20062	TCN2	secreted
CPC	P20151	KLK2	secreted
CPC	P20273	CD22	ecd
CPC	P20333	TNFRSF1B	ecd
CPC	P20645	M6PR	ecd
CPC	P20742	PZP	secreted
CPC	P20809	IL11	secreted
CPC	P20827	EFNA1	secreted
CPC	P20851	C4BPB	secreted
CPC	P20933	AGA	secreted
CPC	P21128	ENDOU	secreted
CPC	P21246	PTN	secreted
CPC	P21583	KITLG	ecd
CPC	P21781	FGF7	secreted
CPC	P21802	FGFR2	ecd
CPC	P21810	BGN	secreted
CPC	P21860	ERBB3	ecd
CPC	P22004	BMP6	secreted
CPC	P22301	IL10	secreted
CPC	P22362	CCL1	secreted
CPC	P22413	ENPP1	ecd
CPC	P22607	FGFR3	ecd
CPC	P22792	CPN2	secreted
CPC	P22894	MMP8	secreted
CPC	P23141	CES1	secreted
CPC	P23142	FBLN1	secreted
CPC	P23280	CA6	secreted
CPC	P23284	PPIB	secreted
CPC	P23434	GCSH	secreted
CPC	P23435	CBLN1	secreted
CPC	P23560	BDNF	secreted
CPC	P24071	FCAR	ecd
CPC	P24387	CRHBP	secreted
CPC	P24394	IL4R	ecd
CPC	P24592	IGFBP6	secreted
CPC	P24855	DNASE1	secreted
CPC	P25445	FAS	ecd
CPC	P25942	CD40	ecd
CPC	P26022	PTX3	secreted
CPC	P26436	ACRV1	secreted
CPC	P26885	FKBP2	secreted
CPC	P26927	MST1	secreted
CPC	P26951	IL3RA	ecd
CPC	P27352	GIF	secreted
CPC	P27487	DPP4	secreted
CPC	P27797	CALR	secreted
CPC	P27918	CFP	secreted
CPC	P27930	IL1R2	ecd
CPC	P28325	CST5	secreted
CPC	P28799	GRN	secreted
CPC	P29376	LTK	ecd
CPC	P29460	IL12B	secreted
CPC	P29622	SERPINA4	secreted
CPC	P30040	ERP29	secreted
CPC	P30043	BLVRB	intracellular
CPC	P30101	PDIA3	secreted
CPC	P30203	CD6	ecd
CPC	P30533	LRPAP1	secreted
CPC	P31025	LCN1	secreted
CPC	P31151	S100A7	secreted
CPC	P31371	FGF9	secreted
CPC	P31947	SFN	secreted
CPC	P31997	CEACAM8	secreted
CPC	P32881	IFNA8	secreted
CPC	P34059	GALNS	secreted
CPC	P34096	RNASE4	secreted
CPC	P34810	CD68	ecd
CPC	P35030	PRSS3	secreted
CPC	P35052	GPC1	ecd
CPC	P35070	BTC	secreted
CPC	P35247	SFTPD	secreted
CPC	P35590	TIE1	secreted
CPC	P35613	BSG	ecd
CPC	P35858	IGFALS	secreted
CPC	P35916	FLT4	ecd
CPC	P35968	KDR	ecd
CPC	P36941	LTBR	ecd
CPC	P36955	SERPINF1	secreted
CPC	P36980	CFHR2	secreted
CPC	P37023	ACVRL1	ecd
CPC	P37802	TAGLN2	secreted
CPC	P39060	COL18A1	secreted
CPC	P39905	GDNF	secreted
CPC	P40189	IL6ST	ecd
CPC	P40225	THPO	secreted
CPC	P40967	PMEL	ecd
CPC	P41159	LEP	secreted
CPC	P41217	CD200	ecd
CPC	P41222	PTGDS	secreted
CPC	P41439	FOLR3	secreted
CPC	P42081	CD86	ecd
CPC	P42701	IL12RB1	ecd
CPC	P42702	LIFR	ecd
CPC	P42830	CXCL5	secreted
CPC	P43235	CTSK	secreted
CPC	P43251	BTD	secreted
CPC	P43490	NAMPT	secreted
CPC	P43652	AFM	secreted
CPC	P45452	MMP13	secreted
CPC	P45877	PPIC	secreted
CPC	P47710	CSN1S1	secreted
CPC	P47972	NPTX2	secreted
CPC	P48023	FASLG	ecd
CPC	P48304	REG1B	secreted
CPC	P48357	LEPR	secreted
CPC	P48551	IFNAR2	ecd
CPC	P48723	HSPA13	secreted
CPC	P48745	NOV	secreted
CPC	P49747	COMP	secreted
CPC	P49763	PGF	secreted
CPC	P49765	VEGFB	secreted
CPC	P49767	VEGFC	secreted
CPC	P49771	FLT3LG	secreted
CPC	P49788	RARRES1	secreted
CPC	P49863	GZMK	secreted
CPC	P50454	SERPINH1	secreted
CPC	P50897	PPT1	secreted
CPC	P51671	CCL11	secreted
CPC	P51688	SGSH	secreted
CPC	P51884	LUM	secreted
CPC	P52823	STC1	secreted
CPC	P54315	PNLIPRP1	secreted
CPC	P54802	NAGLU	secreted
CPC	P55083	MFAP4	secreted
CPC	P55103	INHBC	secreted
CPC	P55145	MANF	secreted
CPC	P55773	CCL23	secreted
CPC	P55774	CCL18	secreted
CPC	P55789	GFER	secreted
CPC	P56202	CTSW	secreted
CPC	P56851	EDDM3B	secreted
CPC	P58062	SPINK7	secreted
CPC	P58499	FAM3B	secreted
CPC	P59861	DEFB131	secreted
CPC	P60568	IL2	secreted
CPC	P61278	SST	secreted
CPC	P61366	OSTN	secreted
CPC	P61626	LYZ	secreted
CPC	P61769	B2M	secreted
CPC	P61812	TGFB2	secreted
CPC	P61916	NPC2	secreted
CPC	P78380	OLR1	ecd
CPC	P78423	CX3CL1	ecd
CPC	P78552	IL13RA1	ecd
CPC	P80075	CCL8	secreted
CPC	P80098	CCL7	secreted
CPC	P80108	GPLD1	secreted
CPC	P80188	LCN2	secreted
CPC	P80370	DLK1	ecd
CPC	P98066	TNFAIP6	secreted
CPC	P98095	FBLN2	secreted
CPC	P98160	HSPG2	secreted
CPC	Q00887	PSG9	secreted
CPC	Q00888	PSG4	secreted
CPC	Q00889	PSG6	secreted
CPC	Q00973	B4GALNT1	secreted
CPC	Q01459	CTBS	secreted
CPC	Q01523	DEFA5	secreted
CPC	Q01524	DEFA6	secreted
CPC	Q01638	IL1RL1	secreted
CPC	Q02246	CNTN2	secreted
CPC	Q02297	NRG1	ecd
CPC	Q02763	TEK	ecd
CPC	Q02809	PLOD1	secreted
CPC	Q02818	NUCB1	secreted
CPC	Q03167	TGFBR3	ecd
CPC	Q03403	TFF2	secreted
CPC	Q03405	PLAUR	secreted
CPC	Q04756	HGFAC	secreted
CPC	Q04771	ACVR1	ecd
CPC	Q06141	REG3A	secreted
CPC	Q06481	APLP2	ecd
CPC	Q06828	FMOD	secreted
CPC	Q07507	DPT	secreted
CPC	Q07699	SCN1B	ecd
CPC	Q08830	FGL1	secreted
CPC	Q09327	MGAT3	secreted
CPC	Q10471	GALNT2	secreted
CPC	Q10588	BST1	secreted
CPC	Q11201	ST3GAL1	secreted
CPC	Q12794	HYAL1	secreted
CPC	Q12805	EFEMP1	secreted
CPC	Q12841	FSTL1	secreted
CPC	Q12884	FAP	secreted
CPC	Q13087	PDIA2	secreted
CPC	Q13162	PRDX4	secreted
CPC	Q13231	CHIT1	secreted
CPC	Q13232	NME3	secreted
CPC	Q13253	NOG	secreted
CPC	Q13261	IL15RA	ecd
CPC	Q13291	SLAMF1	ecd
CPC	Q13316	DMP1	secreted
CPC	Q13332	PTPRS	ecd
CPC	Q13478	IL18R1	ecd
CPC	Q13510	ASAH1	secreted
CPC	Q13740	ALCAM	ecd
CPC	Q13790	APOF	secreted
CPC	Q13884	SNTB1	secreted
CPC	Q14116	IL18	secreted
CPC	Q14508	WFDC2	secreted
CPC	Q14554	PDIA5	secreted
CPC	Q14624	ITIH4	secreted
CPC	Q14626	IL11RA	ecd
CPC	Q14696	MESDC2	secreted
CPC	Q15109	AGER	ecd
CPC	Q15113	PCOLCE	secreted
CPC	Q15198	PDGFRL	secreted
CPC	Q15238	PSG5	secreted
CPC	Q15293	RCN1	secreted
CPC	Q15389	ANGPT1	secreted
CPC	Q15465	SHH	secreted
CPC	Q15485	FCN2	secreted
CPC	Q15582	TGFBI	secreted
CPC	Q15818	NPTX1	secreted
CPC	Q15828	CST6	secreted
CPC	Q15848	ADIPOQ	secreted
CPC	Q16270	IGFBP7	secreted
CPC	Q16552	IL17A	secreted
CPC	Q16557	PSG3	secreted
CPC	Q16595	FXN	secreted
CPC	Q16610	ECM1	secreted
CPC	Q16619	CTF1	secreted
CPC	Q16627	CCL14	secreted
CPC	Q16661	GUCA2B	secreted
CPC	Q16663	CCL15	secreted
CPC	Q16674	MIA	secreted
CPC	Q16769	QPCT	secreted
CPC	Q16820	MEP1B	ecd
CPC	Q16853	AOC3	secreted
CPC	Q1W4C9	SPINK13	secreted
CPC	Q2L4Q9	PRSS53	secreted
CPC	Q2VWP7	PRTG	ecd
CPC	Q495W5	FUT11	secreted
CPC	Q49AH0	CDNF	secreted
CPC	Q4QY38	DEFB134	secreted
CPC	Q53H76	PLA1A	secreted
CPC	Q5GAN4	RNASE12	secreted
CPC	Q5JS37	NHLRC3	secreted
CPC	Q5JTB6	PLAC9	secreted
CPC	Q5VSG8	MANEAL	secreted
CPC	Q5VTL7	FNDC7	secreted
CPC	Q5VUM1	SDHAF4	secreted
CPC	Q5VXI9	LIPN	secreted
CPC	Q5ZPR3	CD276	ecd
CPC	Q641Q3	METRNL	secreted
CPC	Q658N2	WSCD1	secreted
CPC	Q68BL7	OLFML2A	secreted
CPC	Q6E0U4	DMKN	secreted
CPC	Q6EBC2	IL31	secreted
CPC	Q6EMK4	VASN	ecd
CPC	Q6H9L7	ISM2	secreted
CPC	Q6ISS4	LAIR2	secreted
CPC	Q6JVE5	LCN12	secreted
CPC	Q6JVE9	LCN8	secreted
CPC	Q6KF10	GDF6	secreted
CPC	Q6P179	ERAP2	secreted
CPC	Q6P4A8	PLBD1	secreted
CPC	Q6PCB0	VWA1	secreted
CPC	Q6UW32	IGFL1	secreted
CPC	Q6UW88	EPGN	secreted
CPC	Q6UWY2	PRSS57	secreted
CPC	Q6UX06	OLFM4	secreted
CPC	Q6UXD5	SEZ6L2	ecd
CPC	Q6X784	ZPBP2	secreted
CPC	Q6Y288	B3GLCT	secreted
CPC	Q6ZMJ4	IL34	secreted
CPC	Q7Z4P5	GDF7	secreted
CPC	Q7Z5A8	FAM19A3	secreted
CPC	Q7Z5L0	VMO1	secreted
CPC	Q86U17	SERPINA11	secreted
CPC	Q86UD1	OAF	secreted
CPC	Q86WD7	SERPINA9	secreted
CPC	Q86YT9	AMICA1	ecd
CPC	Q8IU54	IFNL1	secreted
CPC	Q8IUX7	AEBP1	secreted
CPC	Q8IW75	SERPINA12	secreted
CPC	Q8IW92	GLB1L2	secreted
CPC	Q8IWL2	SFTPA1	secreted
CPC	Q8IXA5	SPACA3	ecd
CPC	Q8IXL6	FAM20C	secreted
CPC	Q8IZI9	IFNL3	secreted
CPC	Q8IZJ0	IFNL2	secreted
CPC	Q8IZP7	HS6ST3	secreted
CPC	Q8N1E2	LYG1	secreted
CPC	Q8N474	SFRP1	secreted
CPC	Q8N4F0	BPIFB2	secreted
CPC	Q8N8R5	C2orf69	secreted
CPC	Q8N8U9	BMPER	secreted
CPC	Q8N967	LRTM2	ecd
CPC	Q8NBJ5	COLGALT1	secreted
CPC	Q8NBM8	PCYOX1L	secreted
CPC	Q8NBP0	TTC13	secreted
CPC	Q8NBS9	TXNDC5	secreted
CPC	Q8NCG5	CHST4	secreted
CPC	Q8NCR0	B3GALNT2	secreted
CPC	Q8NCW0	KREMEN2	ecd
CPC	Q8NCW5	APOA1BP	secreted
CPC	Q8NER5	ACVR1C	ecd
CPC	Q8NFQ6	BPIFC	secreted
CPC	Q8NHW4	CCL4L1	secreted
CPC	Q8NI99	ANGPTL6	secreted
CPC	Q8TAV5	C11orf45	secreted
CPC	Q8TD06	AGR3	secreted
CPC	Q8TDF5	NETO1	ecd
CPC	Q8TDL5	BPIFB1	secreted
CPC	Q8TEU8	WFIKKN2	secreted
CPC	Q8WUA8	TSKU	secreted
CPC	Q8WUF8	FAM172A	secreted
CPC	Q8WVN6	SECTM1	ecd
CPC	Q8WVV5	BTN2A2	ecd
CPC	Q8WWY7	WFDC12	secreted
CPC	Q8WWZ8	OIT3	secreted
CPC	Q8WX77	IGFBPL1	secreted
CPC	Q8WXD2	SCG3	secreted
CPC	Q8WXW3	PIBF1	secreted
CPC	Q8WYQ4	C22orf15	secreted
CPC	Q8WZ79	DNASE2B	secreted
CPC	Q92484	SMPDL3A	secreted
CPC	Q92520	FAM3C	secreted
CPC	Q92583	CCL17	secreted
CPC	Q92600	CNOT9	secreted
CPC	Q92765	FRZB	secreted
CPC	Q92820	GGH	secreted
CPC	Q92832	NELL1	secreted
CPC	Q92838	EDA	ecd
CPC	Q92874	DNASE1L2	secreted
CPC	Q93091	RNASE6	secreted
CPC	Q969H8	MYDGF	secreted
CPC	Q969J5	IL22RA2	secreted
CPC	Q96AY3	FKBP10	secreted
CPC	Q96BQ1	FAM3D	ecd
CPC	Q96CG8	CTHRC1	secreted
CPC	Q96DA0	ZG16B	secreted
CPC	Q96F46	IL17RA	ecd
CPC	Q96FE5	LINGO1	ecd
CPC	Q96HE7	ERO1A	secreted
CPC	Q96HF1	SFRP2	secreted
CPC	Q96I82	KAZALD1	secreted
CPC	Q96IY4	CPB2	secreted
CPC	Q96KG7	MEGF10	ecd
CPC	Q96KN2	CNDP1	secreted
CPC	Q96L15	ART5	secreted
CPC	Q96LB8	PGLYRP4	secreted
CPC	Q96LB9	PGLYRP3	secreted
CPC	Q96LC7	SIGLEC10	ecd
CPC	Q96LR4	FAM19A4	secreted
CPC	Q96MK3	FAM20A	secreted
CPC	Q96NZ9	PRAP1	secreted
CPC	Q96PD4	IL17F	secreted
CPC	Q96PE7	MCEE	secreted
CPC	Q96RP3	UCN2	secreted
CPC	Q96SL4	GPX7	secreted
CPC	Q99062	CSF3R	ecd
CPC	Q99075	HBEGF	secreted
CPC	Q99435	NELL2	secreted
CPC	Q99538	LGMN	secreted
CPC	Q99574	SERPINI1	secreted
CPC	Q99645	EPYC	secreted
CPC	Q99727	TIMP4	secreted
CPC	Q99784	OLFM1	secreted
CPC	Q99972	MYOC	secreted
CPC	Q99988	GDF15	secreted
CPC	Q9BQ51	PDCD1LG2	ecd
CPC	Q9BQP9	BPIFA3	secreted
CPC	Q9BQS7	HEPH	ecd
CPC	Q9BS86	ZPBP	secreted
CPC	Q9BSG0	PRADC1	secreted
CPC	Q9BT09	CNPY3	secreted
CPC	Q9BTY2	FUCA2	secreted
CPC	Q9BUD6	SPON2	secreted
CPC	Q9BUN1	MENT	secreted
CPC	Q9BW91	NUDT9	secreted
CPC	Q9BX67	JAM3	ecd
CPC	Q9BX68	HINT2	secreted
CPC	Q9BXJ0	C1QTNF5	secreted
CPC	Q9BXJ3	C1QTNF4	secreted
CPC	Q9BXJ4	C1QTNF3	secreted
CPC	Q9BXN1	ASPN	secreted
CPC	Q9BXP8	PAPPA2	secreted
CPC	Q9BXR6	CFHR5	secreted
CPC	Q9BXY4	RSPO3	secreted
CPC	Q9BY76	ANGPTL4	secreted
CPC	Q9BYZ8	REG4	secreted
CPC	Q9BZM5	ULBP2	secreted
CPC	Q9BZP6	CHIA	secreted
CPC	Q9GZP0	PDGFD	secreted
CPC	Q9GZV9	FGF23	secreted
CPC	Q9GZX3	CHST6	secreted
CPC	Q9GZX9	TWSG1	ecd
CPC	Q9GZZ8	LACRT	secreted
CPC	Q9H1E1	RNASE7	secreted
CPC	Q9H2X3	CLEC4M	ecd
CPC	Q9H4F8	SMOC1	secreted
CPC	Q9H5X1	FAM96A	secreted
CPC	Q9H772	GREM2	secreted
CPC	Q9H7Y0	CXorf36	secreted
CPC	Q9HAT2	SIAE	secreted
CPC	Q9HB07	C12orf10	secreted
CPC	Q9HB40	SCPEP1	secreted
CPC	Q9HBE4	IL21	secreted
CPC	Q9HCN6	GP6	ecd
CPC	Q9HD89	RETN	secreted
CPC	Q9NNX6	CD209	ecd
CPC	Q9NPF2	CHST11	secreted
CPC	Q9NPH3	IL1RAP	secreted
CPC	Q9NQ30	ESM1	secreted
CPC	Q9NQ79	CRTAC1	secreted
CPC	Q9NRA1	PDGFC	secreted
CPC	Q9NRC9	OTOR	secreted
CPC	Q9NRM6	IL17RB	ecd
CPC	Q9NS71	GKN1	secreted
CPC	Q9NS85	CA10	secreted
CPC	Q9NSA1	FGF21	secreted
CPC	Q9NT99	LRRC4B	ecd
CPC	Q9NTU7	CBLN4	secreted
CPC	Q9NX46	ADPRHL2	secreted
CPC	Q9NY56	OBP2A	secreted
CPC	Q9NY72	SCN3B	ecd
CPC	Q9NYY1	IL20	secreted
CPC	Q9NZ08	ERAP1	secreted
CPC	Q9NZC2	TREM2	ecd
CPC	Q9NZH8	IL36G	secreted
CPC	Q9NZK5	CECR1	secreted
CPC	Q9NZP8	C1RL	secreted
CPC	Q9P0M4	IL17C	secreted
CPC	Q9UBM4	OPTC	secreted
CPC	Q9UBP4	DKK3	secreted
CPC	Q9UBR2	CTSZ	secreted
CPC	Q9UBU3	GHRL	secreted
CPC	Q9UBX5	FBLN5	secreted
CPC	Q9UGM5	FETUB	secreted
CPC	Q9UHA7	IL36A	secreted
CPC	Q9UHD0	IL19	secreted
CPC	Q9UHF4	IL20RA	ecd
CPC	Q9UHL4	DPP7	secreted
CPC	Q9UIK5	TMEFF2	ecd
CPC	Q9UK55	SERPINA10	secreted
CPC	Q9UKQ9	KLK9	secreted
CPC	Q9UKZ9	PCOLCE2	secreted
CPC	Q9ULB1	NRXN1	ecd
CPC	Q9UMX5	NENF	secreted
CPC	Q9UNA3	A4GNT	secreted
CPC	Q9UQ72	PSG11	secreted
CPC	Q9UQ74	PSG8	secreted
CPC	Q9UQV4	LAMP3	ecd
CPC	Q9Y240	CLEC11A	secreted
CPC	Q9Y2A9	B3GNT3	secreted
CPC	Q9Y2B0	CNPY2	secreted
CPC	Q9Y2E5	MAN2B2	secreted
CPC	Q9Y2Y8	PRG3	secreted
CPC	Q9Y337	KLK5	secreted
CPC	Q9Y3D2	MSRB2	secreted
CPC	Q9Y4K0	LOXL2	secreted
CPC	Q9Y4L1	HYOU1	secreted
CPC	Q9Y5C1	ANGPTL3	secreted
CPC	Q9Y5U5	TNFRSF18	secreted
CPC	Q9Y5W5	WIF1	secreted
CPC	Q9Y5X9	LIPG	secreted
CPC	Q9Y6C2	EMILIN1	secreted
CPC	Q9Y6W8	ICOS	ecd
CPC	Q9Y6Y9	LY96	secreted
CPC	Q9Y6Z7	COLEC10	secreted
CPC	A0A087WWD4	NCAM1	ecd
CPC	A0A0B4J1W1	LILRB1	ecd
CPC	A0A0C4DG43	TSLP	ecd
CPC	A0A0C4DG49	PVR	ecd
CPC	F6Q0M4	TNFRSF14	ecd
CPC	O00206	TLR4	ecd
CPC	O14763	TNFRSF10B	ecd
CPC	O60603	TLR2	ecd
CPC	O75309	CDH16	ecd
CPC	P01589	IL2RA	ecd
CPC	P04626	ERBB2	ecd
CPC	P05067	APP	ecd
CPC	P07204	THBD	ecd
CPC	P07766	CD3E	ecd
CPC	P08069	IGF1R	ecd
CPC	P08138	NGFR	ecd
CPC	P08575	PTPRC	ecd
CPC	P09693	CD3G	ecd
CPC	P10721	KIT	ecd
CPC	P10747	CD28	ecd
CPC	P11279	LAMP1	ecd
CPC	P12318	FCGR2A	ecd
CPC	P13473	LAMP2	ecd
CPC	P14151	SELL	ecd
CPC	P15391	CD19	ecd
CPC	P15514	AREG	ecd
CPC	P15529	CD46	ecd
CPC	P16284	PECAM1	ecd
CPC	P17813	ENG	ecd
CPC	P19022	CDH2	ecd
CPC	P19320	VCAM1	ecd
CPC	P20023	CR2	ecd
CPC	P22897	MRC1	ecd
CPC	P27037	ACVR2A	ecd
CPC	P28827	PTPRM	ecd
CPC	P28906	CD34	ecd
CPC	P28908	TNFRSF8	ecd
CPC	P29317	EPHA2	ecd
CPC	P30530	AXL	ecd
CPC	P31785	IL2RG	ecd
CPC	P31994	FCGR2B	ecd
CPC	P32927	CSF2RB	ecd
CPC	P32942	ICAM3	ecd
CPC	P36888	FLT3	ecd
CPC	P36894	BMPR1A	ecd
CPC	P36896	ACVR1B	ecd
CPC	P38484	IFNGR2	ecd
CPC	P40200	CD96	ecd
CPC	P40259	CD79B	ecd
CPC	P43121	MCAM	ecd
CPC	P43489	TNFRSF4	ecd
CPC	P52799	EFNB2	ecd
CPC	P54762	EPHB1	ecd
CPC	P78504	JAG1	ecd
CPC	P98172	EFNB1	ecd
CPC	Q01151	CD83	ecd
CPC	Q04912	MST1R	ecd
CPC	Q07011	TNFRSF9	ecd
CPC	Q08334	IL10RB	ecd
CPC	Q12866	MERTK	ecd
CPC	Q13651	IL10RA	ecd
CPC	Q13873	BMPR2	ecd
CPC	Q14627	IL13RA2	ecd
CPC	Q15116	PDCD1	ecd
CPC	Q15155	NOMO1	ecd
CPC	Q15303	ERBB4	ecd
CPC	Q16288	NTRK3	ecd
CPC	Q16549	PCSK7	ecd
CPC	Q16620	NTRK2	ecd
CPC	Q29983	MICA	ecd
CPC	Q495A1	TIGIT	ecd
CPC	Q53EL9	SEZ6	ecd
CPC	Q5VWK5	IL23R	ecd
CPC	Q68DV7	RNF43	ecd
CPC	Q7Z6A9	BTLA	ecd
CPC	Q8N423	LILRB2	ecd
CPC	Q8NHJ6	LILRB4	ecd
CPC	Q8TDQ0	HAVCR2	ecd
CPC	Q8TEB7	RNF128	ecd
CPC	Q96DU3	SLAMF6	ecd
CPC	Q96FL9	GALNT14	ecd
CPC	Q9BRK3	MXRA8	ecd
CPC	Q9HBE5	IL21R	ecd
CPC	Q9HBG7	LY9	ecd
CPC	Q9NP60	IL1RAPL2	ecd
CPC	Q9NZQ7	CD274	ecd
CPC	Q9UIB8	CD84	ecd
CPC	Q9ULX7	CA14	ecd
CPC	Q9UMR7	CLEC4A	ecd
CPC	Q9UNG2	TNFSF18	ecd
CPC	Q9UNN8	PROCR	ecd
CPC	P01040	CSTA	intracellular
CPC	P02144	MB	intracellular
CPC	P02794	FTH1	intracellular
CPC	P04080	CSTB	intracellular
CPC	P05089	ARG1	intracellular
CPC	P06733	ENO1	intracellular
CPC	P12955	PEPD	intracellular
CPC	P50502	ST13	intracellular
CPC	Q06830	PRDX1	intracellular
CPC	P04435	TCRB	secreted
CPC	P08195	SLC3A2	secreted
CPC	Q9BZM6	ULBP1	secreted
CPC	Q9H4G4	GLIPR2	secreted
